# Supplementary material for: Trends in Acute Myocardial Infarction–Related Mortality Among US Adults with Respiratory Diseases from 1999 to 2023: A Cross-Sectional Analysis of the CDC WONDER Database
Source: Research Square preprint supplement (doi:10.21203/rs.3.rs-7957244/v1), 2025-11-04
Supplement: Supplementary file 1 [file e95e4bb1f5176613416884a0.docx]

Supplementary Table S1**.** Number of deaths and total number of patients with acute myocardial infarction among respiratory patients in the United States from 1999 to 2023, stratified by gender

| **Year** | **Female Deaths** | **Female Population** | **AAMR(95%CI)** | **Male Deaths** | **Male Population** | **AAMR(95%CI)** |
| --- | --- | --- | --- | --- | --- | --- |
| 1999 | 16157 | 94123092 | 14.99(14.76,15.22) | 19437 | 86285677 | 28.50（28.09，28.91） |
| 2000 | 16279 | 94864102 | 14.88(14.65,15.11) | 19144 | 87120538 | 27.75（27.35，28.15） |
| 2001 | 15995 | 95984408 | 14.46(14.24,14.69) | 18865 | 88320720 | 26.70（26.31，27.08） |
| 2002 | 16071 | 96927703 | 14.35(14.13,14.58) | 18932 | 89280325 | 26.34（25.96，26.72） |
| 2003 | 15516 | 97893297 | 13.67(13.45,13.88) | 18089 | 90197132 | 24.65（24.28，25.01） |
| 2004 | 14329 | 98921524 | 12.52(12.32,12.73) | 16790 | 91283860 | 22.33（21.99，22.68） |
| 2005 | 14359 | 100097839 | 12.35(12.15,12.56) | 16726 | 92453545 | 21.67（21.34，22.00） |
| 2006 | 13573 | 101328442 | 11.48(11.28,11.67) | 15588 | 93690917 | 19.60（19.29，19.92） |
| 2007 | 13026 | 102513830 | 10.85(10.66,11.04) | 15190 | 94889947 | 18.59（18.29，18.90） |
| 2008 | 13758 | 103688156 | 11.22(11.03,11.41) | 15945 | 96106934 | 19.05（18.75，19.35） |
| 2009 | 12948 | 104834186 | 10.44(10.25,10.62) | 14851 | 97272830 | 17.22（16.94，17.50） |
| 2010 | 12659 | 105717426 | 10.04(9.87,10.22) | 14958 | 98174557 | 17.04（16.76，17.31） |
| 2011 | 13083 | 107004480 | 10.14(9.96,10.31) | 15505 | 99588456 | 17.04(16.76,17.31) |
| 2012 | 12772 | 108088829 | 9.71(9.54,9.89) | 15396 | 100737208 | 16.35(16.08，16.60） |
| 2013 | 12815 | 109172782 | 9.55(9.38,9.72) | 15513 | 101912532 | 15.91（15.65，16.16） |
| 2014 | 12503 | 110581619 | 9.12(8.96,9.28) | 15240 | 103227661 | 15.14（14.90，15.39） |
| 2015 | 12941 | 111947362 | 9.26(9.09,9.42) | 15857 | 104606455 | 15.34（15.09，15.58） |
| 2016 | 12685 | 112990913 | 8.91(8.75,9.07) | 16111 | 105650504 | 15.13（14.89，15.37） |
| 2017 | 13159 | 114358026 | 9.01(8.86,9.17) | 16541 | 107089305 | 15.08（14.85，15.32） |
| 2018 | 12846 | 115265998 | 8.66(8.50,8.81) | 16846 | 108045192 | 14.94（14.71，15.17） |
| 2019 | 12379 | 116084432 | 8.21(8.06,8.35) | 16533 | 108896735 | 14.33（14.11，14.55） |
| 2020 | 14781 | 116909132 | 9.69(9.53,9.84) | 20660 | 109725881 | 17.44（17.20，17.69） |
| 2021 | 15688 | 116838617 | 10.64(10.47,10.81) | 22456 | 111399795 | 19.14(18.88,19.39) |
| 2022 | 14596 | 117317971 | 9.36(9.20,9.51) | 19700 | 112190628 | 16.28(16.05,16.51) |
| 2023 | 12762 | 118635845 | 8.18(8.04,8.32) | 16812 | 112893917 | 13.59(13.38,13.80) |

Supplementary Table S2. Age-adjusted death rate from acute myocardial infarction among patients with respiratory diseases per 100,000 people, stratified by race, 1999-2023。

| **Year** | **NH American Indian or AlaskaNative** | **NH Black or African American** | **NH White** | **NH Asian or Pacific Islander** | **Hispanic or Latino** |
| --- | --- | --- | --- | --- | --- |
| 1999 | 15.55 | 20.14 | 20.56 | 14.47 | 15.95 |
| 2000 | 16.29 | 19.21 | 20.32 | 14.06 | 15.55 |
| 2001 | 15.62 | 18.87 | 19.64 | 13.17 | 15.19 |
| 2002 | 18.09 | 18.98 | 19.40 | 14.45 | 14.78 |
| 2003 | 18.55 | 17.02 | 18.51 | 12.44 | 13.39 |
| 2004 | 17.80 | 16.68 | 16.77 | 10.72 | 12.74 |
| 2005 | 13.46 | 15.92 | 16.46 | 11.04 | 13.07 |
| 2006 | 17.65 | 13.91 | 15.26 | 10.02 | 11.58 |
| 2007 | 13.48 | 13.80 | 14.39 | 10.30 | 11.45 |
| 2008 | 13.66 | 13.59 | 14.93 | 10.12 | 11.28 |
| 2009 | 16.78 | 12.67 | 13.71 | 8.98 | 9.97 |
| 2010 | 12.56 | 12.54 | 13.37 | 9.19 | 9.98 |
| 2011 | 14.90 | 12.81 | 13.51 | 8.19 | 9.86 |
| 2012 | 14.88 | 11.92 | 12.98 | 8.24 | 9.69 |
| 2013 | 14.54 | 11.86 | 12.74 | 7.72 | 9.70 |
| 2014 | 14.10 | 11.02 | 12.23 | 7.16 | 9.18 |
| 2015 | 13.92 | 10.98 | 12.54 | 6.98 | 8.96 |
| 2016 | 12.60 | 11.21 | 12.27 | 6.73 | 8.57 |
| 2017 | 13.14 | 11.04 | 12.29 | 7.09 | 9.03 |
| 2018 | 12.63 | 10.70 | 12.03 | 7.23 | 8.89 |
| 2019 | 13.35 | 10.67 | 11.45 | 6.06 | 8.49 |
| 2020 | 17.22 | 14.27 | 13.20 | 8.09 | 13.04 |
| 2021 | 16.53 | 14.85 | 14.97 | 8.49 | 12.71 |
| 2022 | 15.45 | 12.57 | 13.12 | 7.24 | 9.82 |
| 2023 | 10.74 | 10.83 | 11.32 | 5.72 | 8.06 |

Supplementary Table S3. Mortality rate of acute myocardial infarction among patients with respiratory diseases per 100,000 people, stratified by age, 1999-2023

| **Year** | **25-34** | **35-44** | **45-54** | **55-64** | **65-74** | **75-84** | **85+** |
| --- | --- | --- | --- | --- | --- | --- | --- |
| 1999 | 0.09 | 0.57 | 2.99 | 13.28 | 45.86 | 108.59 | 224.55 |
| 2000 | 0.11 | 0.61 | 3.02 | 13.59 | 42.02 | 106.78 | 229.74 |
| 2001 | 0.11 | 0.66 | 3.13 | 12.71 | 41.44 | 103.37 | 219.41 |
| 2002 | 0.11 | 0.67 | 2.90 | 12.52 | 40.69 | 100.78 | 224.66 |
| 2003 | 0.11 | 0.69 | 2.82 | 11.44 | 37.80 | 94.16 | 218.69 |
| 2004 | 0.12 | 0.59 | 2.70 | 10.79 | 34.70 | 86.83 | 192.90 |
| 2005 | 0.12 | 0.61 | 2.86 | 10.64 | 33.60 | 84.54 | 189.61 |
| 2006 | 0.10 | 0.58 | 2.63 | 10.08 | 30.91 | 77.80 | 172.38 |
| 2007 | 0.11 | 0.55 | 2.82 | 9.59 | 28.88 | 72.11 | 166.56 |
| 2008 | 0.15 | 0.60 | 2.78 | 9.95 | 29.04 | 74.73 | 173.81 |
| 2009 | 0.10 | 0.59 | 2.84 | 9.53 | 27.68 | 67.57 | 152.48 |
| 2010 | 0.11 | 0.52 | 2.79 | 9.18 | 26.21 | 66.09 | 153.42 |
| 2011 | 0.13 | 0.59 | 3.04 | 9.42 | 26.87 | 65.11 | 152.22 |
| 2012 | 0.12 | 0.57 | 2.96 | 9.33 | 25.72 | 62.61 | 144.24 |
| 2013 | 0.13 | 0.59 | 2.95 | 9.53 | 25.20 | 60.97 | 139.80 |
| 2014 | 0.12 | 0.61 | 2.87 | 9.76 | 24.58 | 57.42 | 128.85 |
| 2015 | 0.12 | 0.60 | 3.02 | 9.51 | 24.91 | 58.34 | 132.35 |
| 2016 | 0.13 | 0.62 | 2.93 | 9.94 | 24.70 | 57.12 | 124.01 |
| 2017 | 0.12 | 0.568 | 2.98 | 9.923 | 24.974 | 56.238 | 128.39 |
| 2018 | 0.10 | 0.62 | 2.89 | 10.00 | 24.25 | 55.62 | 122.35 |
| 2019 | 0.14 | 0.60 | 2.80 | 9.80 | 23.57 | 52.52 | 113.32 |
| 2020 | 0.22 | 0.85 | 3.57 | 12.32 | 28.89 | 62.70 | 129.14 |
| 2021 | 0.27 | 1.11 | 4.46 | 13.96 | 30.51 | 67.55 | 142.69 |
| 2022 | 0.19 | 0.77 | 3.30 | 11.57 | 27.15 | 59.57 | 124.27 |
| 2023 | 0.18 | 0.67 | 2.62 | 9.59 | 22.60 | 49.43 | 116.22 |

Supplementary Table S4. Age-adjusted mortality rates for acute myocardial infarction among patients with respiratory diseases per 100,000 people; stratified by census region. 1999-2023

| **Year** | **Northeast** | **Midwest** | **South** | **West** |
| --- | --- | --- | --- | --- |
| 1999 | 19.18 | 21.66 | 20.84 | 18.25 |
| 2000 | 19.21 | 20.55 | 20.98 | 17.65 |
| 2001 | 18.44 | 19.97 | 20.33 | 17.22 |
| 2002 | 17.77 | 19.51 | 20.29 | 17.43 |
| 2003 | 16.80 | 18.20 | 18.98 | 16.99 |
| 2004 | 15.86 | 16.41 | 17.12 | 15.52 |
| 2005 | 15.12 | 16.23 | 16.99 | 15.07 |
| 2006 | 13.75 | 15.08 | 15.60 | 13.87 |
| 2007 | 12.67 | 14.15 | 15.18 | 12.94 |
| 2008 | 13.16 | 14.68 | 15.43 | 13.44 |
| 2009 | 11.84 | 13.35 | 14.37 | 12.37 |
| 2010 | 11.66 | 12.97 | 14.24 | 11.72 |
| 2011 | 11.64 | 13.46 | 14.02 | 11.87 |
| 2012 | 10.88 | 13.02 | 13.50 | 11.49 |
| 2013 | 10.52 | 12.73 | 13.36 | 11.26 |
| 2014 | 9.97 | 12.39 | 12.99 | 10.24 |
| 2015 | 10.09 | 12.30 | 13.02 | 10.92 |
| 2016 | 9.12 | 12.19 | 12.81 | 11.02 |
| 2017 | 9.29 | 12.20 | 13.01 | 10.82 |
| 2018 | 8.88 | 11.86 | 13.00 | 10.28 |
| 2019 | 8.33 | 11.47 | 12.24 | 9.99 |
| 2020 | 10.12 | 13.38 | 14.99 | 11.87 |
| 2021 | 9.85 | 14.49 | 17.08 | 13.39 |
| 2022 | 8.84 | 12.40 | 14.22 | 12.05 |
| 2023 | 7.53 | 10.59 | 12.50 | 9.75 |

Supplementary Table S5. Age-adjusted mortality rates for acute myocardial infarction per 100,000 people among patients with respiratory diseases; stratified by urban and rural areas, 1999-2020

| **Year** | **Large Metro** | **Medium/Small Metro** | **Nonmetro** |
| --- | --- | --- | --- |
| 1999 | 19.12 | 19.39 | 24.40 |
| 2000 | 18.61 | 18.94 | 24.68 |
| 2001 | 17.91 | 18.67 | 23.70 |
| 2002 | 17.62 | 18.13 | 24.31 |
| 2003 | 16.43 | 17.60 | 22.86 |
| 2004 | 15.02 | 16.08 | 20.71 |
| 2005 | 14.45 | 15.63 | 21.28 |
| 2006 | 13.38 | 14.30 | 19.49 |
| 2007 | 12.52 | 13.93 | 18.27 |
| 2008 | 12.69 | 14.29 | 19.61 |
| 2009 | 11.47 | 13.03 | 18.71 |
| 2010 | 11.18 | 12.85 | 18.14 |
| 2011 | 11.23 | 12.77 | 18.54 |
| 2012 | 10.47 | 12.58 | 18.28 |
| 2013 | 10.23 | 12.60 | 17.57 |
| 2014 | 9.54 | 11.88 | 17.84 |
| 2015 | 9.58 | 12.11 | 18.48 |
| 2016 | 9.31 | 12.03 | 18.02 |
| 2017 | 9.47 | 11.93 | 18.08 |
| 2018 | 9.13 | 11.78 | 17.95 |
| 2019 | 8.54 | 11.40 | 17.39 |
| 2020 | 10.51 | 13.40 | 20.79 |

Supplementary Table S6 Average annual percent change in age-adjusted mortality from acute myocardial infarction among patients with respiratory diseases; stratified by state-level, 1999-2023

| **State** | **AAPC** | **lower** | **upper** | ***P value*** |
| --- | --- | --- | --- | --- |
| Alabama | -2.18 | -3.02 | -1.54 | <0.001 |
| Arizona | -1.30 | -2.31 | -0.17 | 0.028 |
| Arkansas | 0.31 | -0.68 | 1.94 | 0.321 |
| California | -3.28 | -3.75 | -2.90 | <0.001 |
| Colorado | -1.91 | -2.60 | -1.23 | <0.001 |
| Connecticut | -5.47 | -6.09 | -4.87 | <0.001 |
| Delaware | -5.82 | -6.78 | -4.96 | <0.001 |
| District of Columbia | -1.50 | -2.77 | -0.37 | 0.010 |
| Florida | -1.71 | -2.27 | -1.29 | <0.001 |
| Georgia | -2.46 | -3.23 | -1.69 | <0.001 |
| Hawaii | -3.56 | -4.35 | -2.80 | <0.001 |
| Idaho | -1.70 | -2.29 | -1.17 | <0.001 |
| Illinois | -4.03 | -4.58 | -3.65 | <0.001 |
| Indiana | -1.84 | -2.48 | -1.30 | <0.001 |
| Iowa | -2.64 | -3.76 | -1.73 | <0.001 |
| Kansas | -2.24 | -3.08 | -1.35 | <0.001 |
| Kentucky | 0.56 | 0.08 | 1.04 | 0.026 |
| Louisiana | -2.65 | -3.66 | -1.84 | <0.001 |
| Maine | -3.50 | -4.17 | -2.86 | <0.001 |
| Maryland | -4.19 | -4.67 | -3.66 | <0.001 |
| Massachusetts | -3.71 | -4.49 | -3.05 | <0.001 |
| Michigan | -3.60 | -4.42 | -3.03 | <0.001 |
| Minnesota | -2.89 | -3.71 | -2.31 | <0.001 |
| Mississippi | 0.57 | -0.15 | 1.23 | 0.083 |
| Missouri | -2.99 | -3.46 | -2.53 | <0.001 |
| Montana | -1.77 | -3.65 | -0.48 | 0.014 |
| Nebraska | -0.32 | -1.03 | 0.66 | 0.408 |
| Nevada | -1.98 | -2.98 | -1.01 | <0.001 |
| New Hampshire | -2.93 | -3.45 | -2.44 | <0.001 |
| New Jersey | -3.66 | -4.18 | -3.13 | <0.001 |
| New Mexico | -1.71 | -2.86 | -1.02 | 0.007 |
| New York | -3.27 | -3.99 | -2.66 | <0.001 |
| North Carolina | -2.47 | -3.06 | -1.93 | <0.001 |
| North Dakota | -2.26 | -3.08 | -1.48 | <0.001 |
| Ohio | -3.31 | -3.78 | -2.99 | <0.001 |
| Oklahoma | -2.17 | -2.98 | -1.38 | <0.001 |
| Oregon | -0.85 | -1.41 | -0.27 | 0.005 |
| Pennsylvania | -3.63 | -4.08 | -3.23 | <0.001 |
| Rhode Island | -4.63 | -5.33 | -4.05 | <0.001 |
| South Carolina | -1.77 | -2.58 | -0.98 | <0.001 |
| South Dakota | 1.37 | 0.63 | 2.21 | <0.001 |
| Tennessee | -2.30 | -3.00 | -1.81 | <0.001 |
| Texas | -2.93 | -3.66 | -2.29 | <0.001 |
| Utah | -2.10 | -3.06 | -1.14 | <0.001 |
| Vermont | -4.08 | -5.15 | -3.12 | <0.001 |
| Virginia | -2.65 | -3.14 | -2.17 | <0.001 |
| Washington | -0.80 | -1.33 | -0.23 | 0.008 |
| West Virginia | -2.29 | -2.96 | -1.66 | <0.001 |
| Wisconsin | -1.07 | -1.59 | -0.53 | <0.001 |
| Wyoming | -0.16 | -1.07 | 0.85 | 0.805 |

Supplementary Table S7. Using machine learning to predict age-adjusted mortality rates (AAMR) related to acute myocardial infarction in patients with respiratory diseases, 2024-2033.

| **Year** | **Forecast** | **Lower95%CI** | **Upper95%CI** |
| --- | --- | --- | --- |
| 2024 | 10.17 | 8.38 | 11.97 |
| 2025 | 9.77 | 7.23 | 12.32 |
| 2026 | 9.37 | 6.26 | 12.49 |
| 2027 | 8.97 | 5.37 | 12.57 |
| 2028 | 8.57 | 4.55 | 12.59 |
| 2029 | 8.17 | 3.76 | 12.58 |
| 2030 | 7.77 | 3.01 | 12.53 |
| 2031 | 7.37 | 2.28 | 12.46 |
| 2032 | 6.97 | 1.57 | 12.36 |
| 2033 | 6.57 | 0.88 | 12.25 |

Supplementary Table S8：Annual Percentage Change (APC) and Average Annual Percentage Change (AAPC) in Acute Myocardial Infarction–Related Mortality Among Patients with Respiratory Diseases in the United States, 1999–2023.

| **Characteristics** | **Trend segment** | **Year interval** | **APC (95 % CI)** | **AAPC**  **(95 % CI)** | **P value** |
| --- | --- | --- | --- | --- | --- |
| Entire Cohort |  | 1999-2023 |  | -2.77(-3.18,-2.51) | <0.001 |
|  | 1 | 1999-2009 | -4.40(-6.92,-3.73) |  | 0.001 |
|  | 2 | 2009-2018 | -2.07(-3.26,-0.15) |  | 0.042 |
|  | 3 | 2018-2021 | 8.63(4.81,11.00) |  | <0.001 |
|  | 4 | 2021-2023 | -13.25(-17.93,-8.71) |  | <0.001 |
| Gender |  |  |  |  |  |
| Female |  | 1999-2023 |  | -2.61(-3.02,-2.33) | <0.001 |
|  | 1 | 1999-2009 | -3.86(-6.61,-3.18) |  | 0.013 |
|  | 2 | 2009-2018 | -2.33(-3.52,-0.38) |  | 0.027 |
|  | 3 | 2018-2021 | 7.12(3.57,9.37) |  | <0.001 |
|  | 4 | 2021-2023 | -11.05(-15.72,-5.66） |  | <0.001 |
| Male |  | 1999-2023 |  | -3.14(-3.53,-2.88) | <0.001 |
|  | 1 | 1999-2009 | -5.12(-6.89,-4.42) |  | <0.001 |
|  | 2 | 2009-2018 | -2.12(-3.39,-0.49) |  | 0.023 |
|  | 3 | 2018-2021 | 9.61(5.66,11.99) |  | <0.001 |
|  | 4 | 2021-2023 | -14.93(-19.32,-10.81) |  | <0.001 |
| Census Region |  |  |  |  |  |
| Northeast |  | 1999-2023 |  | -3.88(-4.42,-3.55) | <0.001 |
|  | 1 | 1999-2018 | -4.33(-4.78,-4.02) |  | 0.004 |
|  | 2 | 2018-2021 | 6.15(0.81,8.88) |  | 0.036 |
|  | 3 | 2021-2023 | -13.42(-19.51,-5.80) |  | 0.002 |
| Midwest |  | 1999-2023 |  | -3.00(-3.33,-2.76) | <0.001 |
|  | 1 | 1999-2007 | -5.22(-6.68,-4.47) |  | <0.001 |
|  | 2 | 2007-2018 | -1.94(-2.70,-1.17) |  | <0.001 |
|  | 3 | 2018-2021 | 7.25(3.87,9.19) |  | <0.001 |
|  | 4 | 2021-2023 | -13.71(-17.45,-10.06) |  | <0.001 |
| South |  | 1999-2023 |  | -2.31(-2.76,-2.01) | <0.001 |
|  | 1 | 1999-2009 | -4.08(-7.21,-3.32) |  | 0.006 |
|  | 2 | 2009-2018 | -1.64(-2.96,0.60) |  | 0.010 |
|  | 3 | 2018-2021 | 10.21(5.98,12.84) |  | <0.001 |
|  | 4 | 2021-2023 | -13.31(-18.16,-8.45) |  | <0.001 |
| West |  | 1999-2023 |  | -2.47(-2.96,-2.08) | <0.001 |
|  | 1 | 1999-2018 | -3.29(-3.77,-2.93) |  | <0.001 |
|  | 2 | 2018-2023 | 11.42（6.07，14.61） |  | <0.001 |
| Race/Ethnicity |  |  |  |  |  |
| NH American Indian or Alaska Native |  | 1999-2023 |  | -1.76（-3.29，1.12） | 0.080 |
|  | 1 | 1999-2018 | -1.56（-11.13，29.35） |  | 0.101 |
|  | 2 | 2018-2021 | 11.24（-7.48，17.69） |  | 0.126 |
|  | 3 | 2021-2023 | -20.05（-34.35，1.95） |  | 0.106 |
| NH Asian or Pacific Islander |  | 1999-2023 |  | -3.76（-4.48，-3.25） | <0.001 |
|  | 1 | 1999-2017 | -4.46（-5.32，-3.78） |  | 0.004 |
|  | 2 | 2017-2021 | 6.61（2.36，13.11） |  | 0.014 |
|  | 3 | 2021-2023 | -16.32（-24.51，-7.38） |  | 0.003 |
| NH Black or African American |  | 1999-2023 |  | -2.68（-3.11，-2.38） | <0.001 |
|  | 1 | 1999-2009 | -4.63（-7.63，-3.87） |  | 0.001 |
|  | 2 | 2009-2018 | -2.23（-3.41，0.13） |  | 0.059 |
|  | 3 | 2018-2021 | 12.81（8.36，15.65） |  | <0.001 |
|  | 4 | 2021-2023 | -15.48（-20.06，-11.03） |  | <0.001 |
| NH White |  | 1999-2023 |  | -2.55（-2.99，-2.28） | <0.001 |
|  | 1 | 1999-2009 | -4.24（-6.57，-3.58） |  | 0.003 |
|  | 2 | 2009-2018 | -1.83（-3.12，-0.11） |  | 0.043 |
|  | 3 | 2018-2021 | 7.58（3.72，10.03） |  | <0.001 |
|  | 4 | 2021-2023 | -11.28（-16.19，-5.59） |  | <0.001 |
| Hispanic or Latino |  | 1999-2023 |  | -2.77（-3.42，-2.15） | <0.001 |
|  | 1 | 1999-2018 | -3.29（-4.01，-2.70） |  | <0.001 |
|  | 2 | 2018-2021 | 17.88（10.24，22.67） |  | <0.001 |
|  | 3 | 2021-2023 | -23.37（-30.05，-16.09） |  | <0.001 |
| Urbanization |  |  |  |  |  |
| Large Metro |  | 1999-2020 |  | -3.33（-3.73，-2.95） | <0.001 |
|  | 1 | 1999-2014 | -4.76（-5.43，-4.28） |  | <0.001 |
|  | 2 | 2014-2020 | 0.33（-1.55，4.67） |  | 0.681 |
| Medium/Small Metro |  | 1999-2020 |  | -2.31（-2.74，-1.89） | <0.001 |
|  | 1 | 1999-2011 | -3.92（-5.42，-3.17） |  | <0.001 |
|  | 2 | 2011-2020 | -0.12（-1.31，2.64） |  | 0.915 |
| Nonmetro |  | 1999-2020 |  | -1.41（-1.83，-0.98） | <0.001 |
|  | 1 | 1999-2010 | -3.13（-4.93，-2.25） |  | <0.001 |
|  | 2 | 2010-2020 | 0.52（-0.49，2.71） |  | 0.267 |
| Ten-Year Age Groups |  |  |  |  |  |
| 25–34 years |  | 1999-2023 |  | 1.92（1.04，2.79） | <0.001 |
|  | 1 | 1999-2018 | 0.58(-0.54,1.48) |  | 0.317 |
|  | 2 | 2018-2021 | 29.70(17.45,37.23) |  | <0.001 |
|  | 3 | 2021-2023 | -19.46(-28.16,-8.81) |  | 0.002 |
| 35-44 years |  | 1999-2023 |  | 0.11(-0.63,0.62) | 0.653 |
|  | 1 | 1999-2018 | -0.50(-1.23,0.05) |  | 0.077 |
|  | 2 | 2018-2021 | 22.70(14.65,27.48) |  | <0.001 |
|  | 3 | 2021-2023 | -21.83(-28.88,-14.65) |  | <0.001 |
| 45–54 years |  | 1999-2023 |  | -0.45(-1.11,-0.04) | 0.033 |
|  | 1 | 1999-2018 | -0.10(-0.68,0.36) |  | 0.619 |
|  | 2 | 2018-2021 | 13.99(7.58,17.25) |  | <0.001 |
|  | 3 | 2021-2023 | -21.45(-28.07,-14.91) |  | <0.001 |
| 55–64 years |  | 1999-2023 |  | -1.51(-1.96,-1.18) | <0.001 |
|  | 1 | 1999-2007 | -4.55(-7.16,-3.35) |  | <0.001 |
|  | 2 | 2007-2018 | 0.07(-0.97,1.16) |  | 0.883 |
|  | 3 | 2018-2021 | 12.55(8.33,14.93) |  | <0.001 |
|  | 4 | 2021-2023 | -16.30(-20.96,-12.11) |  | <0.001 |
| 65–74 years |  | 1999-2023 |  | -2.84(-3.22,-2.59) | <0.001 |
|  | 1 | 1999-2009 | -5.13(-6.61,-4.43) |  | <0.001 |
|  | 2 | 2009-2018 | -1.44(-2.82,-0.0004) |  | 0.049 |
|  | 3 | 2018-2021 | 8.91(5.23,11.14) |  | <0.001 |
|  | 4 | 2021-2023 | -13.27(-17.75,-9.61) |  | <0.001 |
| 75–84 years |  | 1999-2023 |  | -3.32(-3.69,-3.08) | <0.001 |
|  | 1 | 1999-2009 | -4.89(-6.88,-4.31) |  | <0.001 |
|  | 2 | 2009-2018 | -2.70(-3.82,-0.99) |  | 0.015 |
|  | 3 | 2018-2021 | 7.96(4.24,10.29) |  | <0.001 |
|  | 4 | 2021-2023 | -13.55(-17.67,-9.43) |  | <0.001 |
| 85+ years |  | 1999-2023 |  | -2.60(-3.10,-2.16) | <0.001 |
|  | 1 | 1999-2016 | -3.75(-4.93,-3.23) |  | 0.008 |
|  | 2 | 2016-2023 | 0.25(-1.92,6.60) |  | 0.755 |
